# Supplementary material
Source: PubMed Central journal article supplement (PMC4626441)
Supplement: NIHMS673899-supplement-01.pdf [file NIHMS673899-supplement-01.pdf]

Supplementary Data, Materials and Methods.

Dillon *et al.*

**Gut Dendritic Cell Activation Links an Altered Colonic Microbiome to Mucosal and Systemic T Cell Activation in Untreated HIV-1 infection.**

SM Dillon<sup>1</sup>, EJ Lee<sup>1</sup>, CV Kotter<sup>1</sup>, GL Austin<sup>2</sup>, S Gianella<sup>3</sup>, B Siewe<sup>4</sup>, DM Smith<sup>3</sup>, AL Landay<sup>4</sup>, MC McManus<sup>5</sup>, CE Robertson<sup>1,6</sup>, DN Frank<sup>1,6</sup>, MD McCarter<sup>7</sup> and CC Wilson<sup>1</sup>.

<sup>1</sup>Department of Medicine, University of Colorado Anschutz Medical Campus, Aurora, Colorado, USA. <sup>2</sup>Department of Gastroenterology, University of Colorado Anschutz Medical Campus, Aurora, Colorado, USA. <sup>3</sup>Division of Infectious Diseases, University of California, San Diego, La Jolla, California, USA. <sup>4</sup>Department of Immunology-Microbiology, Rush University Medical Center, Chicago, Illinois, USA. <sup>5</sup>Department of Pathology, University of Colorado Anschutz Medical Campus, Aurora, Colorado, USA. <sup>6</sup>University of Colorado Microbiome Research Consortium, Aurora, Colorado, USA. <sup>7</sup>Department of Surgery, University of Colorado Anschutz Medical Campus, Aurora, Colorado, USA.

## SUPPLEMENTARY RESULTS

### Defining two distinct populations of colonic LP mDCs

In initial studies, we utilized an *ex vivo* colon LPMC model from uninfected donors<sup>1-4</sup> that provided high numbers of LPMC to extensively characterize human LP mDC subsets. Colonic LPMC consisted of two phenotypically distinct colonic LP mDC subsets, both of which expressed HLA-DR and CD11c, but were delineated by expression of CD1c (hereafter referred to as CD1c<sup>+</sup> mDCs, CD1c<sup>neg</sup> mDCs). Colon CD1c<sup>+</sup> mDCs have an increased activation profile characterized by an increased maturation (CD83) and co-stimulatory molecule (CD86) expression relative to CD1c<sup>neg</sup> mDCs (**Supplementary Figure 1a, b**). Both subsets express similar levels of CD40 (**Supplementary Figure 1c**). In agreement with our previous work, colonic CD1c<sup>+</sup> mDCs had minimal expression of CD103<sup>2</sup> and similar low expression was observed in CD1c<sup>neg</sup> mDCs (**Supplementary Figure 1d**).

Murine studies initially implicated CX<sub>3</sub>CR1 as a crucial molecule involved in the ability of intestinal DCs to extend dendrites into the gut lumen and sample luminal contents<sup>5</sup>. A higher fraction of CD1c<sup>+</sup> mDCs expressed CX<sub>3</sub>CR1 compared to CD1c<sup>neg</sup> mDCs (**Supplementary Figure 1e**), suggesting that CD1c<sup>+</sup> mDCs are more likely to sample luminal contents and that greater exposure to bacteria may thus explain their more activated profile. However, recent studies have suggested that high expression of CX<sub>3</sub>CR1 preferentially defines a subset of murine macrophages,<sup>6,7</sup> and human colonic DCs obtained via a cell migration/"walkout" method lacked CX<sub>3</sub>CR1 expression<sup>8</sup>. Intestinal resident tissue macrophages have been reported to lack expression of CD11c<sup>9</sup> and our gating strategy defines mDCs as CD11c<sup>+</sup> thereby excluding macrophages from our CD1c<sup>+</sup> and CD1c<sup>neg</sup> cell populations. To provide further support that the HLA-DR<sup>+</sup>CD11c<sup>+</sup> cells would not contain tissue macrophages, we utilized histological techniques to stain colon biopsies with the macrophage-specific marker Ham56 in conjunction with CD11c and observed that greater than 90% of Ham56<sup>+</sup> cells (ie. macrophages) did not co-express CD11c (n=5; data not shown).

It has been proposed that recruitment of circulating blood monocytes replenishes senescent and apoptotic intestinal macrophages.<sup>9</sup> We evaluated expression of CD14 on both colon mDC subsets and observed a higher fraction of CD14-expressing CD1c<sup>neg</sup> mDCs than CD1c<sup>+</sup> mDCs (**Supplementary Figure 1f**), suggesting that CD1c<sup>neg</sup> mDCs may contain newly recruited monocytes with the potential to differentiate into tissue DCs<sup>10</sup> or macrophages<sup>9,11</sup>.

Supplementary Data, Materials and Methods.  
Dillon *et al.*

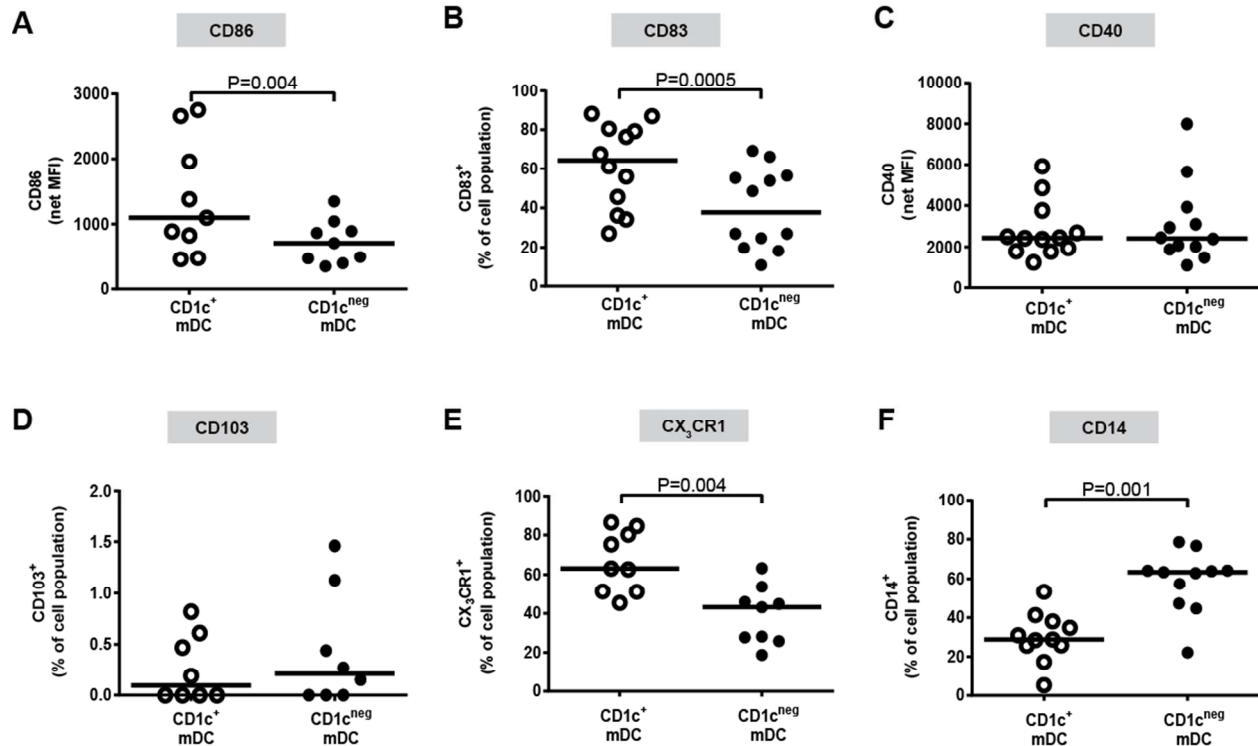

**Supplementary Figure 1. Phenotypic characterization of human colonic lamina propria (LP) myeloid DC (mDC) subsets.** Multi-color flow cytometry techniques were used to evaluate the expression of various cell surface markers on colonic LP CD11c+HLA-DR+ mDCs, delineated into two subsets based on CD1c expression 19. CD1c<sup>+</sup> mDCs (open circles) and CD1c<sup>neg</sup> mDCs (closed circles) were assessed for expression of (A) CD86 (n=9), (B) CD83 (n=12), (C) CD40 (n=12), (D) CD103 (n=8), (E) CX3CR1 (n=9) and (F) CD14 (n=11). Values are shown as either expression levels (Mean Fluorescence Intensity; MFI) for (A) CD86 and (C) CD40 indicative of a population shift in expression or shown as the percent of each mDC subset positive for the cell surface marker (B) CD83, (D) CD103, (E) CX3CR1 and (F) CD14 indicative of distinctive expression on a specific population of cells in each mDC subset. Appropriate isotype controls were removed to control for background staining (net). Lines represent median values and statistical analysis was performed using the Wilcoxon matched-pairs signed rank test.

**SUPPLEMENTARY TABLES.****Supplementary Table S1. Colon DC frequencies.**

|                                                     | Uninfected subjects<br>(n=10) | HIV-infected subjects<br>(n=19) | P<br>value* |
|-----------------------------------------------------|-------------------------------|---------------------------------|-------------|
| CD1c <sup>+</sup> mDC<br>(% of viable leukocytes)   | 0.053%<br>(0.023-0.167%)      | 0.028%<br>(0.005-0.210%)        | 0.06        |
| CD1c <sup>neg</sup> mDC<br>(% of viable leukocytes) | 0.319%<br>(0.169-0.667%)      | 0.236%<br>(0.088-1.030%)        | 0.77        |
| CD303 <sup>+</sup> pDC<br>(% of viable leukocytes)  | 0.058%<br>(0.031-0.154%)      | 0.054%<br>(0.019-0.207%)        | 0.78        |

Values are shown as median (range). \*Statistical analysis was performed using the Mann-Whitney test.

**Supplementary Table S2: Colon and blood T cell activation**

|                                                                                | Uninfected subjects<br>(n=13) | HIV-1 infected subjects<br>(n=24) | P<br>value* |
|--------------------------------------------------------------------------------|-------------------------------|-----------------------------------|-------------|
| <b>Colon CD38<sup>+</sup>HLA-DR<sup>+</sup> CD4 and CD8 T cells</b>            |                               |                                   |             |
| <i>% of colon CD4 or CD8 T cells</i>                                           |                               |                                   |             |
| CD4 T cells                                                                    | 0.5%<br>(0.1-1.5%)            | 3.2%<br>(0.8-18.1%)               | <0.0001     |
| CD8 T cells                                                                    | 1.4%<br>(0.3-6.9%)            | 8.4%<br>(1.9-34.6%)               | <0.0001     |
| <i>Number per gram of mucosal tissue (x10<sup>6</sup>)</i>                     |                               |                                   |             |
| CD4 T cells                                                                    | 0.03<br>(0.002-0.8)           | 0.06<br>(0.01-0.9)                | <0.0001     |
| CD8 T cells                                                                    | 0.02<br>(0.005-0.05)          | 0.4<br>(0.05-2.5)                 | <0.0001     |
| <b>Peripheral blood CD38<sup>+</sup>HLA-DR<sup>+</sup> CD4 and CD8 T cells</b> |                               |                                   |             |
| <i>% of peripheral blood CD4 or CD8 T cells</i>                                |                               |                                   |             |
| CD4 T cells                                                                    | 0.9%<br>(0.5-2.6%)            | 2.8%<br>(0.6-10.4%)               | <0.0001     |
| CD8 T cells                                                                    | 1.7%<br>(0.4-4.6%)            | 15.1%<br>(4.8-38.5%)              | <0.0001     |

Values are shown as median (range). \*Statistical analysis performed using the Mann Whitney test.

Supplementary Data, Materials and Methods.  
Dillon *et al.*

**Supplementary Table S3: Mucosal cytokine-producing T cell frequencies**

|                                                                                 | Uninfected subjects<br>(n=10) | HIV-1 infected subjects<br>(n=22) | P<br>value* |
|---------------------------------------------------------------------------------|-------------------------------|-----------------------------------|-------------|
| <b>IFN-<math>\gamma</math> (Th1), IL-17 (Th17) and IL-22 (Th22) CD4 T cells</b> |                               |                                   |             |
| <i>% of colon CD4 T cells</i>                                                   |                               |                                   |             |
| IFN- $\gamma$ <sup>+</sup> CD4 T cells                                          | 51.3%<br>(43.4-59.7%)         | 39.8%<br>(25.4-70.0%)             | 0.06        |
| IL-17 <sup>+</sup> CD4 T cells                                                  | 10.2%<br>(43.4-59.7%)         | 3.2%<br>(0.7-24.3%)               | <0.0001     |
| IL-22 <sup>+</sup> CD4 T cells                                                  | 14.9%<br>(7.9-21.9%)          | 2.3%<br>(0.2-26.1%)               | <0.0001     |
| <i>Number per gram of mucosal tissue (<math>\times 10^4</math>)</i>             |                               |                                   |             |
| IFN- $\gamma$ <sup>+</sup> CD4 T cells                                          | 169.3<br>(104.8-248.2)        | 114.4<br>(19.5-432.2)             | <0.05       |
| IL-17 <sup>+</sup> CD4 T cells                                                  | 31.5<br>(15.4-82.8)           | 9.3<br>(2.5-29.8)                 | <0.0001     |
| IL-22 <sup>+</sup> CD8 T cells                                                  | 45.7<br>(25.6-75.5)           | 7.3<br>(0.9-39.5)                 | <0.0001     |
| <b>IFN-<math>\gamma</math> CD8 T cells</b>                                      |                               |                                   |             |
| <i>% of colon CD8 T cells</i>                                                   |                               |                                   |             |
| IFN- $\gamma$ <sup>+</sup> CD8 T cells                                          | 76.6%<br>(60.5-88.7%)         | 91.1%<br>(77.6-97.9%)             | <0.0001     |
| <i>Number per gram of mucosal tissue (<math>\times 10^4</math>)</i>             |                               |                                   |             |
| IFN- $\gamma$ <sup>+</sup> CD8 T cells                                          | 79.5<br>(42.8-162.3)          | 405.7<br>(2.36-1670.0)            | <0.0001     |

Values are shown as median (range). \*Statistical analysis performed using the Mann Whitney test.

**Supplementary Table S4. Comparison between HIV-altered mucosal bacteria (HAMB) species with the same species detected in stool samples**

|                                        | Mucosal tissue | Stool <sup>#</sup> |
|----------------------------------------|----------------|--------------------|
| <b>Proteobacteria phylum</b>           |                |                    |
| <i>Acinetobacter junii</i>             | RED            | GREY               |
| <i>Schlegelella thermodepolymerans</i> | RED            | GREY               |
| <b>Bacteroidetes phylum</b>            |                |                    |
| <i>Prevotella copri</i>                | RED            | RED                |
| <i>Prevotella stercorea</i>            | RED            | RED                |
| <i>Prevotella oris</i>                 | RED            | P=0.063            |
| <i>Bacteroides stercoris</i>           | BLUE           | BLUE               |
| <i>Bacteroides thetaiotaomicron</i>    | BLUE           | BLUE               |
| <i>Bacteroides dorei</i>               | BLUE           | BLUE               |
| <i>Bacteroides acidifaciens</i>        | BLUE           | GREY               |
| <i>Alistipes putredinis</i>            | BLUE           | BLUE               |
| <i>Barnesiella intestinihominis</i>    | BLUE           | GREY               |
| <b>Firmicutes phylum</b>               |                |                    |
| <i>Blautia luti</i>                    | BLUE           | GREY               |
| <i>Blautia glucerasei</i>              | BLUE           | P=0.0845           |
| <i>Blautia schinkii</i>                | BLUE           | GREY               |
| <i>Blautia product</i>                 | BLUE           | GREY               |
| <i>Rumminococcus bromii</i>            | BLUE           | P=0.0854           |
| <i>Ruminococcus gnavus</i>             | BLUE           | GREY               |
| <i>Clostridium saccharogumia</i>       | BLUE           | P=0.0561           |
| <i>Clostridium xylanovorans</i>        | BLUE           | BLUE               |
| <i>Acidaminococcus intestini</i>       | RED            | GREY               |
| <i>Bacterodites cellulosolvens</i>     | BLUE           | BLUE               |

Statistical analysis: Mann-Whitney test to compare the abundance of each bacterial species in uninfected subjects (n=14 ) with HIV-1-infected subjects (mucosal tissue n=17; stool n=18 ). All species listed were statistically different between uninfected and HIV-1-infected subjects in mucosal tissue. **RED** = statistically higher in HIV-1-infected subjects; **BLUE** = statistically lower in HIV-1-infected subjects; **GREY** = no statistical difference between uninfected and HIV-1-infected subjects. <sup>#</sup>: A total of 45 species identified in the stool were statistically different between uninfected and HIV-1-infected subjects.

Supplementary Data, Materials and Methods.  
Dillon *et al.*

**Supplementary Table S5: Percent of cytokine<sup>+</sup> CD1c<sup>+</sup> mDC in response to *in vitro* stimulation with HAMB**

|                               | Cytokine <sup>+</sup> CD1c <sup>+</sup> mDC (% of total CD1c <sup>+</sup> mDC) |                                |                     |                   |
|-------------------------------|--------------------------------------------------------------------------------|--------------------------------|---------------------|-------------------|
|                               | No exogenous stimulation                                                       | <i>P. copri</i>                | <i>P. stercorea</i> | <i>R. bromii</i>  |
| <b>IL-23</b>                  | 0.25 (0-0.70)                                                                  | 4.07 (0.85-13.9) <sup>#*</sup> | 5.91 (2.42-20.7)*   | 1.69 (0.21-8.57)* |
| <b>IL-1<math>\beta</math></b> | 1.85 (0-4.25)                                                                  | 34.1 (15.4-59.2)*              | 22.8 (7.57-46.3)*   | 13.1 (8.07-36.0)* |
| <b>IL-10</b>                  | 0 (0-0.85)                                                                     | 18.0 (10.7-24.2)*              | 7.15 (1.79-9.87)*   | 2.93 (1.58-8.45)* |

Values are shown as median (range). <sup>#</sup>Statistical analysis performed using the Wilcoxon matched-pairs signed rank test comparing percent of cytokine<sup>+</sup> CD1c<sup>+</sup> mDC in HAMB-stimulated conditions with unstimulated control. \*p=0.03

## SUPPLEMENTARY MATERIALS AND METHODS

### Study exclusion criteria.

Study exclusion criteria are extensively detailed elsewhere.<sup>12</sup> For HIV-1-infected subjects included 1) presence of AIDS-defining condition within 6 months and a CD4 count <200cells/ $\mu$ l within 3 months of clinic visit, 2) HIV-1 plasma viral load <2000 HIV-1 RNA copies/ml. Exclusion for all subjects included 1) medical history of a bleeding disorder, rectal bleeding or surgical history of left-sided colonic, rectal or anal resection or anastomosis, 2) medical history of inflammatory bowel disease or other intestinal inflammatory disorders, 3) chronic or acute medical conditions such as cancer, heart disease, diabetes, or hepatitis, 4) bacterial infection requiring antibiotic treatment in the 3 months prior to clinic visit and 5) continuous for more than 3 days within the past 60 days of immunosuppressives, immune modulators or probiotics.

### Collection, storage and processing of clinical samples.

Collection, storage and processing of samples are extensively detailed in a previous publication.<sup>12</sup> Briefly, rectal swabs were collected at the time of study screening (typically 2 weeks prior to flexible sigmoidoscopy procedure) and immediately stored in liquid nitrogen. On the day of the clinic visit, all subjects had been fasting for at least 12hrs and underwent an enema (Sunmark McKesson, San Francisco, CA) before undergoing a flexible sigmoidoscopy using 2.3mm standard forceps. Twenty biopsies were placed in HBSS for immediate tissue digestion. Biopsies for tissue HIV-1 viral load assessment and DNA isolation were placed in RNeasy lysis buffer (Qiagen, Crawley, UK) (n=4 per subject) for 20-24hrs, snap frozen and stored in liquid nitrogen. Three biopsies were placed in 10% neutral buffered formalin for 20-24hrs prior to being embedded into paraffin.

Peripheral blood samples were collected into BD Vacutainer Blood Collection Tubes containing EDTA or Heparin (BD Biosciences; San Jose, CA). For serum collection, peripheral blood was collected into BD Vacutainer Blood Collection Tubes containing a clot activator ((BD Biosciences; San Jose, CA).

### Processing of colon biopsies, plasma, serum and PBMC.

Processing of colon biopsies, plasma, serum and PBMC are extensively detailed elsewhere<sup>12</sup>. Briefly, twenty colon pinch biopsies were washed in HBSS and colonic cells released via a tissue digestion protocol using Collagenase D (Roche, Indianapolis, IN). Whole blood was centrifuged to isolate plasma. For serum collection, peripheral blood was left at RT for 60min prior to centrifugation. Plasma and serum were frozen at -80°C in single-use aliquots. PBMC were isolated from heparinized blood by standard Ficoll-Hypaque (GE Healthcare, Piscataway, NJ) density gradient centrifugation, cryopreserved and stored in liquid nitrogen.

### Mucosal and plasma cytokine measurements.

Colon single cell suspensions were cultured at  $2 \times 10^5$  cells/100 $\mu$ l for 16hrs in cRPMI without exogenous stimulation. Mucosal cytokine levels were measured using a Custom Q-Plex Array (Quansys Biosciences, Logan, UT) following the manufacturers protocol. Specifically, levels of IL1 $\beta$ , IL-5, IL-6, IL-8, IL-10, IL-12p70, IL-15, IL-17, IL-23, IFN- $\gamma$  and TNF- $\alpha$  were evaluated. Only TNF- $\alpha$ , IFN- $\gamma$  and IL-10 were detectable at levels above the assay limit of quantification. Measurement of plasma cytokine levels were performed using the Human Cytokine High Sensitivity Screen (IL-1 $\alpha$ , IL-1 $\beta$ , IL-2, IL-4, IL-5, IL-10, IL-12p70, IL-13, IL-15, IL-17, IL-23,



## Supplementary Data, Materials and Methods.

Dillon *et al.*

IFN- $\gamma$ , TNF- $\alpha$ , TNF- $\beta$ ) (Quansys Biosciences) following the manufacturer's protocol. Levels of plasma IL-6 were evaluated in EDTA plasma samples using a commercially available ELISA (R&D Systems) as previously reported.<sup>12</sup>

### **Histological staining and analysis of colonic biopsies.**

*Assessment of microbial product levels, CD11c<sup>+</sup> mDCs, and HAM56<sup>+</sup> macrophages in colonic LP:* Formalin fixed paraffin embedded human colon biopsy tissue was cut into 7 $\mu$ m thick sections. Tissue sections then underwent paraffin removal, rehydration and heat mediated antigen retrieval at 95°C using pH9 TRIS/EDTA/Tween20 buffer. Tissue samples then underwent a two step staining procedure; first for CD11c (abcam, Cambridge, United Kingdom) and LTA (Thermo, Waltham, MA) or LPS (Hycult, Plymouth Meeting, PA), anti-Goat Alexa488 (Molecular Probes, Eugene, OR) was used to detect CD11c and anti-mouse Alexa647 (Molecular Probes) was used to detect LTA and/or LPS. Tissue samples were then blocked with 2% Normal Goat Serum then stained with a primary antibody against HAM56 (ENZO Life Sciences, Farmingdale, NY). HAM56 was detected using anti-mouse Alexa555 (Molecular Probes). Fluorescent staining was preserved using Invitrogen Prolong Gold with DAPI.

Images were acquired using a Zeiss LSM510 META confocal microscope, at least ten 3x3 tiled 63x images were acquired for each biopsy, and three biopsies per patient were analyzed. Zeiss Zen Software (Jena, Germany) was used to create specific regions of interest only around the LP for analysis. Using the software the total area and the area that stained with LTA/LPS was calculated within the LP. All regions of interest for an individual patient were combined and the percentage of the LP containing microbial products (LTA/LPS) was calculated. To analyze whether microbial products preferentially associated with mDCs or macrophages the total number of mDCs and macrophages that either did or did not associate with microbial products (LTA/LPS) were enumerated per square millimeter of LP using Image J Software (NIH Bethesda, MD). mDCs association with microbial products was defined as cells that costained with CD11c and LTA/LPS, while macrophage association with bacterial products was defined as cells that costained with HAM56 and LTA/LPS.

*Assessment of mononuclear infiltration:* Three sections were cut at regular intervals from each colon biopsy tissue block, stained with hematoxylin and eosin (H&E), and evaluated by light microscopy. Evaluation was performed by a gastrointestinal pathologist who was blinded to the HIV-1 status of each patient. Mononuclear infiltrate was assessed as the relative cellularity of the LP infiltrate consisting of lymphocytes, plasma cells, eosinophils and occasional neutrophils, in addition to presence or absence of circumscribed lymphoid aggregates. The degree of mononuclear infiltration was quantified on a scale of 0 = Not present, Minimal = 0.5, Mild = 1, Moderate = 2, and Severe = 3. The scores of 3 sections of each colon biopsy were then averaged to obtain an overall score.

### ***In vitro* mitogenic stimulation of single-cell colon biopsy preparations.**

Evaluation of frequencies of colonic CD4 T cells capable of producing IFN- $\gamma$  (Th1), IL-17 (Th17) or IL-22 (Th22) and frequencies of IFN- $\gamma$ -producing CD8 T cells after *in vitro* have been extensively detailed elsewhere<sup>1,12</sup>. Briefly, isolated colon cells were cultured in RPMI + 10% human AB serum (Gemini Bioproducts, West Sacramento, CA) + 1% penicillin/streptomycin/L-glutamine (Sigma-Aldrich, St Louis, MO) (cRPMI) and stimulated with 250ng/ml PMA and 1 $\mu$ g/ml ionomycin (both Sigma-Aldrich) in the presence of Brefeldin A (1 $\mu$ g/ml, BD Biosciences) for 16hrs at 37°C, 5% CO<sub>2</sub>. Cells were collected and frequencies of cytokine<sup>+</sup> T

## Supplementary Data, Materials and Methods.

Dillon *et al.*

cells determined by intracellular flow cytometry assay. In some instances, numbers of colon cells obtained after collagenase-digestion were insufficient to perform this assay.

***Ex vivo* LPMC assay system.**

Phenotypic characterization of colonic LP mDC subsets and assessment of functional responses of CD1c<sup>+</sup> mDCs to commensal bacteria (see below) utilized a previously detailed *in vitro* tissue culture model consisting of isolated colon LPMC<sup>1-4</sup>. Briefly, intestinal tissue samples were obtained from adult patients undergoing elective abdominal surgery represent otherwise discarded tissue from surgical anastomotic junctions considered macroscopically normal. Patients with a history of inflammatory bowel disease or receiving chemotherapy, radiation, or other immunosuppressive drugs were excluded. Patients undergoing surgery signed a release allowing the unrestricted use of discarded tissues for research purposes. Protected patient information was de-identified to laboratory personnel, and usage of these samples was granted exempt research status by COMIRB at the University of Colorado Anschutz Medical Campus. LPMC were isolated by a two-step procedure involving removal of epithelial cells followed by collagenase digestion of the remaining tissue to yield LPMC<sup>1-4</sup>.

***In vitro* exposure of LPMC to commensal bacteria.**

Isolated colon LPMC were cultured at 37°C, 5% CO<sub>2</sub> in RPMI + 10% AB serum + 1% L-glutamine (Life Technologies, Grand Island, NY) at 1x10<sup>6</sup> cells/ml with live *Prevotella copri*, *P. stercorea* or *Ruminococcus bromii* (2.5 bacteria:1 LPMC) or without exogenous stimuli for 2hrs prior to the addition of 1% penicillin/streptomycin (Life Technologies) + 500µg/ml piperacillin/tazobactam (Zosyn; Wyeth, Madison, NY). Brefeldin A (1µg/ml) was added 2 hours later. LPMC were collected after an additional 16-18hrs and frequencies of cytokine<sup>+</sup> CD1c<sup>+</sup> mDCs determined by intracellular flow cytometry assay (see below).

**Commensal bacteria stocks.**

*P. copri* (DSM# 18205, DSMZ, Braunschweig, Germany), *P. stercorea* (DSM# 18206) and *R. bromii* (ATCC# 27255, ATCC Manassas, VA) were expanded at 37°C under anaerobic conditions achieved by using a BD GasPak EZ Anaerobe Pouch System (BD Diagnostics) per manufacturer's protocols with slight modifications. Specifically, *P. copri* was expanded by culturing on Brucella plates (BD Diagnostics) for 5-7 days; *P. stercorea* was expanded in liquid chopped meat broth (BD Biosciences; Hardy Diagnostics, Santa Maria, CA) supplemented with 1% Trace Minerals (ATCC), 1% Vitamin Supplements (ATCC), 0.05% Tween80, 29.7mM acetic acid, 8.1mM propionic acid and 4.4mM butyric acid (all Sigma-Aldrich) for 5-7 days; *R. bromii* was expanded in liquid chopped meat broth (BD Biosciences; Hardy Diagnostics) for 1-2 days. All bacteria were stored long-term at -80°C in 10% glycerol. To prepare working stocks, bacteria were expanded from long-term stocks as described above, resuspended in DPBS and stored at -80°C in single-use aliquots. Bacterial enumeration was performed using the BD Cell Viability and Counting Kit (BD Biosciences). Bacteria were diluted 1:100 in PBS and mixed with a known number of BD Counting beads. Samples were then acquired on an LSR II Flow Cytometer (BD Biosciences) and the concentration of total bacteria in the sample was back calculated based on the BD Counting Beads.

## Supplementary Data, Materials and Methods.

Dillon *et al.***Surface and intracellular flow cytometry staining assays, acquisition and analysis.**

Multi-color flow cytometry protocols to evaluate colon and blood DC and T cell frequencies and activation status and to determine DC and T cell cytokine frequencies have been previously detailed<sup>1,2,12</sup>. All antibodies and dyes are listed in Supplementary Table S6. To identify viable, mononuclear cells and exclude epithelial cells, cells were first gated on CD45 expression and then viable cells within this population determined.

*Colon cells isolated from biopsies and PBMC:* Colonic mDC subsets were defined within an HLA-DR<sup>+</sup> CD11c<sup>hi</sup> population to exclude B cells and macrophages<sup>9</sup> with specific CD1c (BDCA-1) expression (CD1c<sup>+</sup>, CD1c<sup>neg</sup>) determined using an isotype control as previously described.<sup>2,12</sup> pDCs were defined as within CD3<sup>-</sup> cells as BDCA-2 (CD303)<sup>+</sup> using a matched isotype control.<sup>2</sup> Activation was determined by evaluating the level of specific CD40 expression or the percent of CD83<sup>+</sup> DCs using an isotype control. Specific gating strategies and activation expression profiles are illustrated in Supplementary Figure 2. Evaluation of DC frequencies and degree of activation were only performed when there were at least 25 CD1c<sup>+</sup>, CD1c<sup>neg</sup>, or pDC events. Colonic and blood T cells were identified from within a CD3<sup>+</sup>γδ TCR<sup>-</sup> population to exclude intestinal γδ T cells that express CD4 and CD8.<sup>12</sup> To determine activated colon CD4 and CD8 T cells, the combination of antibodies was altered slightly to accommodate other fluorochrome-labeled antibodies and a specific CD4 antibody was excluded from the antibody cocktail. CD4 T cells were identified as CD3<sup>+</sup>CD8<sup>-</sup> and T cell activation evaluated by determining expression of HLA-DR in combination with CD38 or matched isotype control. Peripheral blood T cells were identified as CD3<sup>+</sup>CD4<sup>+</sup> or CD3<sup>+</sup>CD8<sup>+</sup>. Frequencies of colon Th1, Th17 and Th22 cells were determined using IFN-γ, IL-17 and IL-22 antibodies with matched isotype controls (Supplementary Table 2).

*Colon LPMC from normal donors:* LP CD1c<sup>+</sup> mDCs and CD1c<sup>neg</sup> mDCs were identified in viable, CD45<sup>+</sup> LPMC using the same antibodies and viability dye as described above. Levels of CD40 and CD86 were evaluated as well as frequencies of CD83- CD103-, CX<sub>3</sub>CR1- or CD14-expressing CD1c<sup>+</sup> or CD1c<sup>neg</sup> mDC were determined using antibodies and appropriately matched isotype controls as detailed in Supplementary Table 7. Enumeration of cytokine<sup>+</sup> CD1c<sup>+</sup> mDCs following *in vitro* stimulation of LPMC were performed following previously described multi-color intracellular cytokine flow cytometry staining techniques<sup>2,13,14</sup> using antibodies detailed in Supplementary Table S7. Production of IL-23 was defined by co-expression of IL-12p40 and p19.<sup>13,14</sup>

**Supplementary Table S6. Antibodies and dyes used to determine DC and T cell frequencies, activation and cytokine production in colon biopsies and PBMC.**

|                                                                          | Clone      | Company         | Location      |
|--------------------------------------------------------------------------|------------|-----------------|---------------|
| <b>Viable, mononuclear cell identification</b>                           |            |                 |               |
| PerCpCy5.5 CD45                                                          | 2D1        | eBioscience     | San Diego, CA |
| Aqua Live/Dead Fixable Viability dye                                     |            | Invitrogen      | Carlsbad, CA  |
| <b>DC identification and assessment of activation</b>                    |            |                 |               |
| APC BDCA-1 (CD1c)                                                        | AD5-8E7    | Miltenyi Biotec | Auburn, CA    |
| APC mouse IgG2a isotype control                                          | S43.10     |                 |               |
| APC-Cy7 HLA-DR                                                           | L243       | BD Biosciences  | San Jose, CA  |
| PE-Cy5 CD11c                                                             | B-ly6      | BD Biosciences  |               |
| FITC BDCA-2 (CD303)                                                      | AC144      | Miltenyi Biotec |               |
| FITC mouse IgG1 isotype control                                          | IS5-21F5   |                 |               |
| Biotinylated CD40                                                        | EA-5       | Ancell          | Bayport, MN   |
| Biotinylated mouse IgG1 isotype control                                  | MOPC-31C   |                 |               |
| Streptavidin ECD (PE-Texas Red)                                          |            | Beckman Coulter | Fullerton, CA |
| PE CD83                                                                  | HB15e      | BD Biosciences  |               |
| PE mouse IgG1                                                            | MOPC-21    |                 |               |
| <b>Colon T cell identification and assessment of activation</b>          |            |                 |               |
| eFluor <sup>450</sup> CD3                                                | OKT3       | eBioscience     |               |
| AF700 CD4                                                                | RPA-T4     | BD Biosciences  |               |
| PE-Cy7 CD8                                                               | RPA-T8     | BD Biosciences  |               |
| PE $\gamma\delta$ TCR                                                    | 11F2       | BD Biosciences  |               |
| APC-Cy7 HLA-DR                                                           | L243       | BD Biosciences  |               |
| AF700 CD38                                                               | HIT2       | eBioscience     |               |
| AF700 mouse IgG1 isotype control                                         | P3.6.2.8.1 |                 |               |
| <b>Blood T cell identification and assessment of activation</b>          |            |                 |               |
| eFluor <sup>450</sup> CD3                                                | OKT3       | eBioscience     |               |
| PE-Cy7 CD8                                                               | RPA-T8     | BD Biosciences  |               |
| APC-Cy7 HLA-DR                                                           | L243       | BD Biosciences  |               |
| APC-Cy7 mouse IgG2 isotype control                                       | G155-178   |                 |               |
| AF700 CD38                                                               | HIT2       | eBioscience     |               |
| AF700 mouse IgG1 isotype control                                         | P3.6.2.8.1 |                 |               |
| <b>Colon T cell identification and assessment of cytokine production</b> |            |                 |               |
| ECD CD3                                                                  | UCHT1      | Beckman Coulter |               |
| APC-Cy7 CD4                                                              | RPA-T4     | BD Biosciences  |               |
| PE-Cy7 CD8                                                               | RPA-T8     | BD Biosciences  |               |
| FITC $\gamma\delta$ TCR                                                  | 11F2       | BD Biosciences  |               |
| AF700 IFN- $\gamma$                                                      | B27        | BD Biosciences  |               |
| AF700 mouse IgG1 isotype control                                         | MOPC-21    |                 |               |
| V <sup>450</sup> IL-17                                                   | N49-653    | BD Biosciences  |               |
| V450 mouse IgG1 isotype control                                          | MOPC-21    |                 |               |
| PE IL-22                                                                 | 22URTI     | eBioscience     |               |
| PE mouse IgG1 isotype control                                            | P3.6.2.8.1 |                 |               |

Supplementary Data, Materials and Methods.  
Dillon *et al.*

**Supplementary Table S7. Antibodies and dyes used to determine CD1c<sup>+</sup> and CD1c<sup>neg</sup> mDC frequencies, activation and cytokine production in LPMC from normal donors.**

|                                                               | Clone       | Company           | Location      |
|---------------------------------------------------------------|-------------|-------------------|---------------|
| <b>Viable, mononuclear cell identification</b>                |             |                   |               |
| PerCpCy5.5 CD45                                               | 2D1         | eBioscience       | San Diego, CA |
| Aqua Live/Dead Fixable Viability dye                          |             | Invitrogen        | Carlsbad, CA  |
| <b>mDC subset identification and assessment of activation</b> |             |                   |               |
| APC BDCA-1 (CD1c)                                             | AD5-8E7     | Miltenyi Biotec   | Auburn, CA    |
| APC mouse IgG2a isotype control                               | S43.10      |                   |               |
| APC-Cy7 HLA-DR                                                | L243        | BD Biosciences    | San Jose, CA  |
| PE-Cy5 CD11c                                                  | B-ly6       | BD Biosciences    |               |
| Biotinylated CD40                                             | EA-5        | Ancell            | Bayport, MN   |
| Biotinylated mouse IgG1 isotype control                       | MOPC-31C    |                   |               |
| Streptavidin ECD (PE-Texas Red)                               |             | Beckman Coulter   | Fullerton, CA |
| PE CD83                                                       | HB15        | BD Biosciences    |               |
| PE mouse IgG1                                                 | MOPC-21     |                   |               |
| FITC CD86                                                     | 2331(FUN-1) | BD Biosciences    |               |
| FITC mouse IgG1 isotype control                               | MOPC-21     |                   |               |
| PE CD103                                                      | Ber-ACT8    | BD Biosciences    |               |
| PE mouse IgG1 isotype control                                 | MOPC-21     |                   |               |
| PE CX3CR1                                                     | 2A9-1       | MBL International | Woburn, MA    |
| PE rat IgG2b isotype control                                  | 3G8         |                   |               |
| V <sup>450</sup> CD14                                         | MΦP9        | BD Biosciences    |               |
| V <sup>450</sup> mouse IgG2a                                  | 27-35       |                   |               |
| <b>Assessment of CD1c<sup>+</sup> mDC cytokine production</b> |             |                   |               |
| APC BDCA-1 (CD1c)                                             | AD5-8E7     | Miltenyi Biotec   | Auburn, CA    |
| APC mouse IgG2a isotype control                               | S43.10      |                   |               |
| APC-Cy7 HLA-DR                                                | L243        | BD Biosciences    | San Jose, CA  |
| AF700 CD11c                                                   | B-ly6       |                   |               |
| eFluor <sup>450</sup> IL-12p40                                | C8.6        | eBioscience       |               |
| eFluor <sup>450</sup> mouse IgG1 isotype control              | P3.6.2.8.1  |                   |               |
| PE p19                                                        | 23dcdp      | eBioscience       |               |
| PE mouse IgG2b isotype control                                | eBMG2b      |                   |               |
| FITC IL-1β                                                    | CRM56       | eBioscience       |               |
| FITC mouse IgG1 isotype control                               | P3.6.2.8.1  |                   |               |
| PE-Cy7 IL-10                                                  | JES3-9D7    | Biolegend         |               |
| PE-Cy7 rat IgG1 isotype control                               | RTK2071     |                   |               |

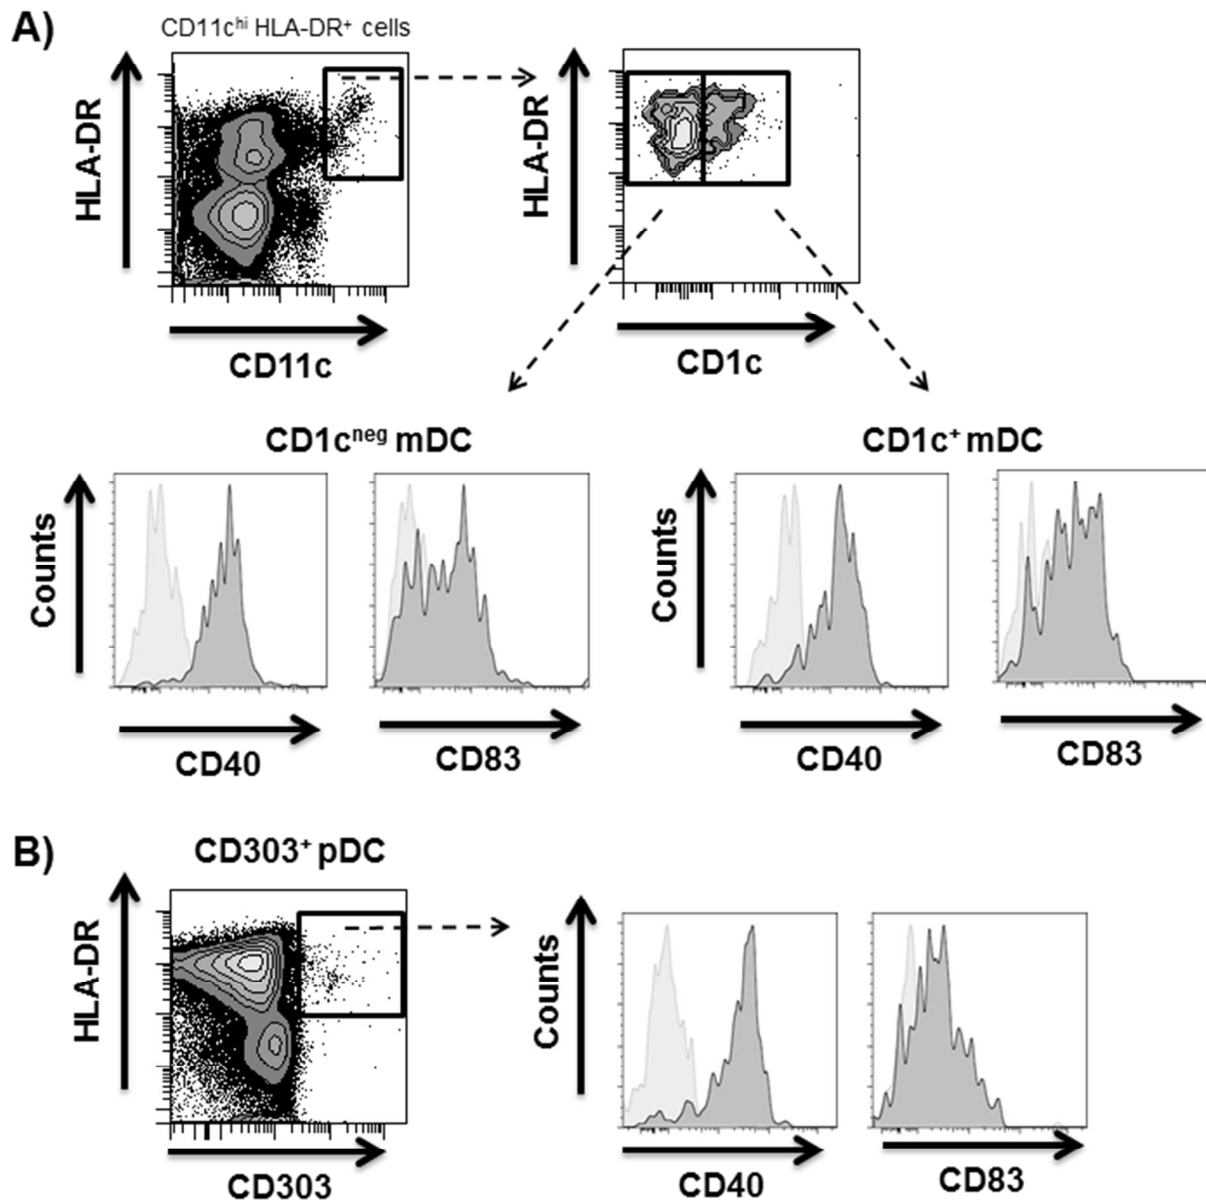

**Supplementary Figure 2.** Representative flow plots illustrating gating strategy to determine CD40 and CD83 expression on colonic myeloid dendritic cells (mDC) and plasmacytoid DC (pDC). All populations were identified from viable, CD45<sup>+</sup> cells (plots not shown). A) CD1c<sup>+</sup> and CD1c<sup>neg</sup> mDC were identified within CD11c<sup>hi</sup> HLA-DR<sup>+</sup> cells using an isotype control (plot not shown).<sup>2,12</sup> Expression of CD40 and CD83 (dark gray) were evaluated using isotype controls (light gray). B) CD303<sup>+</sup> pDC were identified in CD3<sup>neg</sup> cells using an isotype control (plot not shown).<sup>2</sup> Expression of CD40 and CD83 (dark gray) were evaluated using isotype controls (light gray).

Supplementary Data, Materials and Methods.  
Dillon *et al.*

## REFERENCES

- 1 Dillon, S. M. *et al.* HIV-1 infection of human intestinal lamina propria CD4+ T cells in vitro is enhanced by exposure to commensal *Escherichia coli*. *J Immunol* **189**, 885-896, doi:10.4049/jimmunol.1200681 (2012).
- 2 Dillon, S. M. *et al.* Human intestinal lamina propria CD1c+ dendritic cells display an activated phenotype at steady state and produce IL-23 in response to TLR7/8 stimulation. *J Immunol* **184**, 6612-6621, doi:10.4049/jimmunol.1000041 (2010).
- 3 Howe, R. *et al.* Evidence for dendritic cell-dependent CD4(+) T helper-1 type responses to commensal bacteria in normal human intestinal lamina propria. *Clin Immunol* **131**, 317-332, doi:10.1016/j.clim.2008.12.003 (2009).
- 4 Steele, A. K. *et al.* Microbial exposure alters HIV-1-induced mucosal CD4+ T cell death pathways Ex vivo. *Retrovirology* **11**, 14, doi:10.1186/1742-4690-11-14 (2014).
- 5 Niess, J. H. *et al.* CX3CR1-mediated dendritic cell access to the intestinal lumen and bacterial clearance. *Science* **307**, 254-258, doi:10.1126/science.1102901 (2005).
- 6 Persson, E. K., Jaensson, E. & Agace, W. W. The diverse ontogeny and function of murine small intestinal dendritic cell/macrophage subsets. *Immunobiology* **215**, 692-697, doi:10.1016/j.imbio.2010.05.013 (2010).
- 7 Varol, C., Zigmund, E. & Jung, S. Securing the immune tightrope: mononuclear phagocytes in the intestinal lamina propria. *Nature reviews. Immunology* **10**, 415-426, doi:10.1038/nri2778 (2010).
- 8 Mann, E. R. *et al.* Intestinal dendritic cells: their role in intestinal inflammation, manipulation by the gut microbiota and differences between mice and men. *Immunology letters* **150**, 30-40, doi:10.1016/j.imlet.2013.01.007 (2013).
- 9 Smith, P. D. *et al.* Intestinal macrophages and response to microbial encroachment. *Mucosal immunology* **4**, 31-42, doi:10.1038/mi.2010.66 (2011).
- 10 Varol, C. *et al.* Monocytes give rise to mucosal, but not splenic, conventional dendritic cells. *The Journal of experimental medicine* **204**, 171-180, doi:10.1084/jem.20061011 (2007).
- 11 Smythies, L. E. *et al.* Mucosal IL-8 and TGF-beta recruit blood monocytes: evidence for cross-talk between the lamina propria stroma and myeloid cells. *Journal of leukocyte biology* **80**, 492-499, doi:10.1189/jlb.1005566 (2006).
- 12 Dillon, S. M. *et al.* An altered intestinal mucosal microbiome in HIV-1 infection is associated with mucosal and systemic immune activation and endotoxemia. *Mucosal immunology* **7**, 983-994, doi:10.1038/mi.2013.116 (2014).
- 13 Manuzak, J., Dillon, S. & Wilson, C. Differential interleukin-10 (IL-10) and IL-23 production by human blood monocytes and dendritic cells in response to commensal enteric bacteria. *Clinical and vaccine immunology : CVI* **19**, 1207-1217, doi:10.1128/CVI.00282-12 (2012).
- 14 Manuzak, J. A. *et al.* Increased *Escherichia coli*-induced interleukin-23 production by CD16+ monocytes correlates with systemic immune activation in untreated HIV-1-infected individuals. *Journal of virology* **87**, 13252-13262, doi:10.1128/JVI.01767-13 (2013).

## **Gut Dendritic Cell Activation Links an Altered Colonic Microbiome to Mucosal and Systemic T Cell Activation in Untreated HIV-1 infection.**

Stephanie M Dillon, PhD<sup>1</sup>, Eric J Lee, MS<sup>1</sup>, Cassandra V Kotter, MS<sup>1</sup>, Gregory L Austin, MD<sup>2</sup>, Sara Gianella, MD<sup>3</sup>, Basile Siewe, PhD<sup>4</sup>, Davey M Smith, MD<sup>3</sup>, Alan L Landay, PhD<sup>4</sup>, Martine C McManus, MD<sup>5</sup>, Charles E Robertson PhD.<sup>1,6</sup>, Daniel N Frank, PhD<sup>1,6</sup>, Martin D McCarter, MD<sup>7</sup> and Cara C Wilson, MD<sup>1</sup>.

<sup>1</sup>Department of Medicine, University of Colorado Anschutz Medical Campus, Aurora, Colorado, USA. <sup>2</sup>Department of Gastroenterology, University of Colorado Anschutz Medical Campus, Aurora, Colorado, USA. <sup>3</sup>Division of Infectious Diseases, University of California, San Diego, La Jolla, California, USA. <sup>4</sup>Department of Immunology-Microbiology, Rush University Medical Center, Chicago, Illinois, USA. <sup>5</sup>Department of Pathology, University of Colorado Anschutz Medical Campus, Aurora, Colorado, USA. <sup>6</sup>University of Colorado Microbiome Research Consortium, Aurora, Colorado, USA. <sup>7</sup>Department of Surgery, University of Colorado Anschutz Medical Campus, Aurora, Colorado, USA.

**DISCLOSURE:** The authors declare no conflict of interest.

### **ACKNOWLEDGEMENTS**

We wish to express our sincere gratitude to all the study participants as well as the physicians and staff at the University of Colorado Infectious Disease Group Practice Clinic. We thank the staff at the Clinical and Translational Research Center (CTRC) and the University Hospital endoscopy clinic for their assistance with our clinical study. We also acknowledge the staff at University of Colorado Hospital CTRC Core Lab for performing the IL-6 assay and the San Diego CFAR Translational Virology Core for performing viral RNA measurements on colon tissue.

This study was supported by National Institutes of Health Grants 1RO1 DK088663, AI36214 and, in part, by NIH/NCATS Colorado CTSI Grant Number UL1 TR000154.

### **KEYWORDS**

Human intestinal dendritic cells, HIV-1 pathogenesis, microbiome, mucosal immunology.
